# Supplementary material for: PDMAEMA-b-polysulfobetaine brushes-modified ε-polylysine as a serum-resistant vector for highly efficient gene delivery
Source: Royal Society of Chemistry journal article supplement (doi:10.1039/c2jm35502g), 2012-01-01
Supplement: c2jm35502g.pdf [file c2jm35502g.pdf]

## Supplementary Information

Xinyun Zhai<sup>a</sup>, Wei Wang<sup>a</sup>, Chuandong Wang<sup>b</sup>, Qin Wang<sup>b\*</sup>, Wenguang Liu<sup>a\*</sup>

<sup>a</sup>School of Materials Science and Engineering, Tianjin Key Laboratory of Composite and Functional Materials, Tianjin University, Tianjin 30072, PR China

<sup>b</sup>Shandong Provincial Key Laboratory of Biomedical Polymers, Jinan 250100, Shandong Province, PR China

Because of the problem in measuring molecular weights of copolymer with Gel Permeation Chromatography (GPC), we used <sup>1</sup>H NMR spectra to calculate the molecule weights of the vectors through the integral method.

The actual branched chain length of PDMAEMA and PMPDSAH conjugated onto ε-polylysine can be calculated according to the following equations:

$$n = \frac{S_b/6 - S_a/2}{S_b/6} \times x \quad (1)$$

$$p = \frac{S_d/6 - (S_c - S_a)/2}{S_d/6} \times y \quad (2)$$

Where the x and y is the theoretical degree of polymerization (DP) of each PDMAEMA and MPDSAH chain respectively; n and p is the actual DP of each PDMAEMA and PMPDSAH chain respectively; S<sub>a</sub> is the integral area of the double bonds for the unreacted DMAEMA monomers; S<sub>b</sub> is the integral area of the -N-(CH<sub>3</sub>)<sub>2</sub> for both unreacted DMAEMA monomers and PDMAEMA chains conjugated onto ε-polylysine (Fig. S1(A)); S<sub>c</sub> is the integral area of the double bonds for the unreacted DMAEMA and MPDSAH monomers; S<sub>d</sub> is the integral areas of the -(CH<sub>3</sub>)<sub>2</sub> for both unreacted MPDSAH monomers and PMPDSAH chains conjugated onto ε-polylysine (Fig. S1(B)).

---

\*To whom correspondence should be addressed  
E-mail: wgliu@tju.edu.cn (W. Liu), wangqin0005@sina.com (Q. Wang).

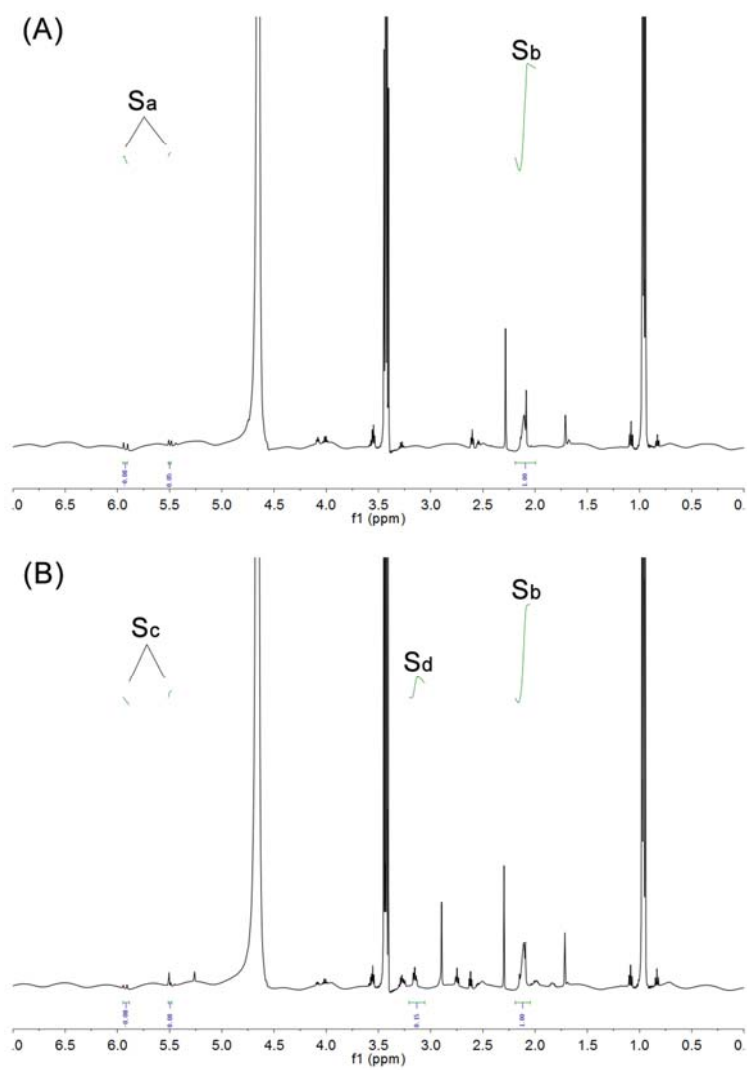

**Figure S1.**  $^1\text{H}$  NMR spectra of (A)  $\epsilon$ -Ply-DMA<sub>70</sub> without dialysis after 3 h reaction and (B)  $\epsilon$ -Ply-DMA<sub>70</sub>-MPD<sub>20</sub> without dialysis after reaction.

Table S1. Molecular weight of polymers estimated from integration of  $^1\text{H}$  NMR spectra

| Sample                                               | Theoretical value |           | Actual value |           | Molecular weight |
|------------------------------------------------------|-------------------|-----------|--------------|-----------|------------------|
|                                                      | DMAEMA(x)         | MPDSAH(y) | DMAEMA(n)    | MPDSAH(p) |                  |
| $\epsilon$ -Ply-DMA <sub>70</sub>                    | 70                | —         | 45           | —         | 67670            |
| $\epsilon$ -Ply-DMA <sub>70</sub> -MPD <sub>20</sub> | 70                | 20        | 45           | 14        | 99268            |
| $\epsilon$ -Ply-DMA <sub>70</sub> -MPD <sub>30</sub> | 70                | 30        | 45           | 23        | 125495           |
| $\epsilon$ -Ply-DMA <sub>70</sub> -MPD <sub>40</sub> | 70                | 40        | 45           | 31        | 145608           |
